# Supplementary material
Source: Elsevier journal article supplement (https://www.sciencedirect.com/science/article/pii/S0021755720302072)
Supplement: mmc1 [file S0021755720302072:mmc1.docx]

JPED-D-20-00064 _ Supplementary Material

**Table S1 - Terms used in the search in each database and the number of articles retrieved.**

| **PUBMED** | **Number of articles retrieved** |
| --- | --- |
| (((“Obesity”[Mesh] OR “Obesity”[tiab] OR “Overweight”[Mesh] OR “Overweight”[tiab] OR “Pediatric Obesity”[Mesh] OR “Obesity, Pediatric”[tiab] OR “Childhood Onset Obesity”[tiab] OR “Obesity, Childhood Onset”[tiab] OR “Obesity in Childhood”[tiab] OR “Child Obesity”[tiab] OR “Obesity, Child”[tiab] OR “Childhood Obesity”[tiab] OR “Obesity, Childhood”[tiab] OR “Infant Overweight”[tiab] OR “Overweight, Infant”[tiab] OR “Infantile Obesity”[tiab] OR “Obesity, Infantile”[tiab] OR “Infant Obesity”[tiab] OR “Obesity, Infant”[tiab] OR “Childhood Overweight”[tiab] OR “Overweight, Childhood”[tiab] OR “Adolescent Overweight”[tiab] OR “Overweight, Adolescent”[tiab] OR “Adolescent Obesity”[tiab] OR “Obesity, Adolescent”[tiab] OR “Obesity in Adolescence”[tiab])) AND ((“Vitamin D”[tiab] OR “Cholecalciferol”[tiab] OR “Hydroxycholecalciferols“[tiab] OR “Ergocalciferols[tiab]”[tiab] OR “25-Hydroxyvitamin D“[tiab] OR “Dihydrotachysterol“[tiab] OR “Calciol”[tiab] OR “calcifediol”[tiab] OR “Vitamin D3”[tiab] OR “Cholecalciferols”[tiab] OR “Vitamin D deficiency”[tiab] OR “25(OH)D”[tiab] OR “25-Hydroxyvitamin D” OR “Vitamin D” [Mesh]))) AND ((“Child”[tiab] OR “Child”[MeSH terms] OR “Children”[tiab] OR “childhood”[tiab] OR “adolescent”[MeSH terms] OR “adolescent”[tiab] OR adolescent*[tiab] OR “pediatric”[tiab] OR “teens”[tiab] OR “teen”[tiab] OR Teenage*[tiab] OR youth*[tiab] OR infan*[tiab])) | 785 |
| **EMBASE** | **Number of articles retrieved** |
| ('child'/exp OR 'child' OR 'children' OR 'juvenile'/exp OR 'juvenile' OR 'youth' OR 'childhood'/exp OR 'childhood' OR 'adolescent'/exp OR 'adolescent' OR 'teenager' OR 'infant'/exp OR 'infant' OR 'adolescence'/exp OR 'adolescence' OR 'teenage') AND ('obesity'/exp OR 'adipose tissue hyperplasia' OR 'adipositas' OR 'adiposity' OR 'alimentary obesity' OR 'body weight, excess' OR 'corpulency' OR 'fat overload syndrome' OR 'nutritional obesity' OR 'obesitas' OR 'obesity' OR 'overweight' OR 'obese patient'/exp OR 'obese individuals' OR 'obese participants' OR 'obese patient' OR 'obese people' OR 'obese person' OR 'obese persons' OR 'obese subjects' OR 'obesity patient') AND ('vitamin d'/exp OR 'vitamin d' OR 'vitamin d deficiency'/exp OR 'avitaminosis d' OR 'calciferol deficiency' OR 'cholecalciferol deficiency' OR 'colecalciferol deficiency' OR 'ergocalciferol deficiency' OR 'vitamin d deficiency' OR 'vitamin d2 deficiency' OR 'vitamin d3 deficiency') | 2,364 |
| **LILACS** | **Number of articles retrieved** |
| Vitamin D and obesity and children | 6 |
